# Supplementary figures and images for: Clathrin-independent endocytosis of ErbB2 in geldanamycin-treated human breast cancer cells
Source: Oxford University Press journal article supplement (doi:10.1242/jcs.020404), 2008-09-03

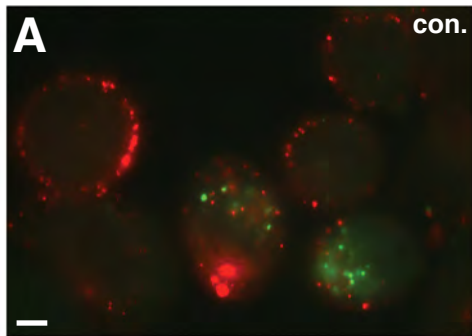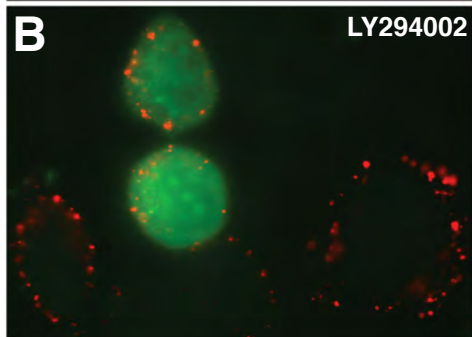

**ErbB2**

**GFP-FYVE**

Supplement: jcs020404-sup-020404-figs1.pdf [file jcs020404-sup-020404-figs1.pdf]

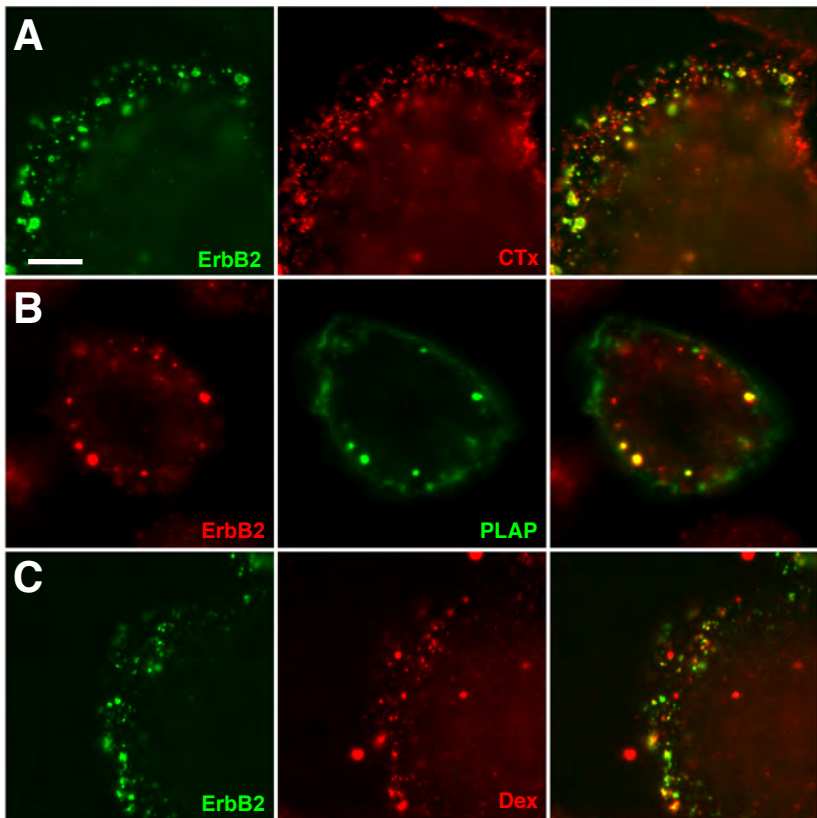

Supplement: jcs020404-sup-020404-figs2.pdf [file jcs020404-sup-020404-figs2.pdf]

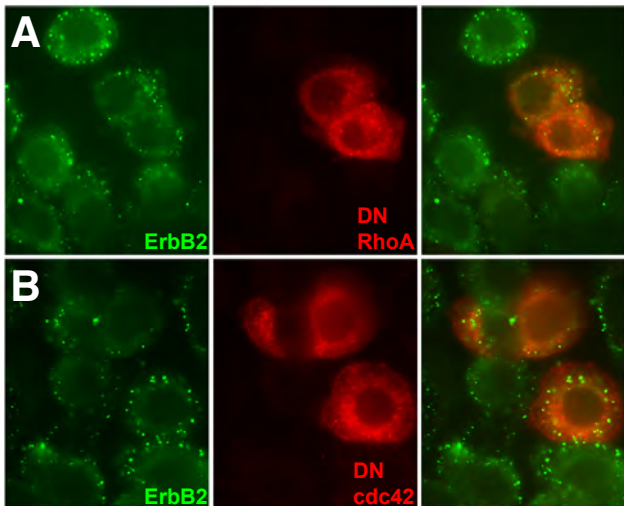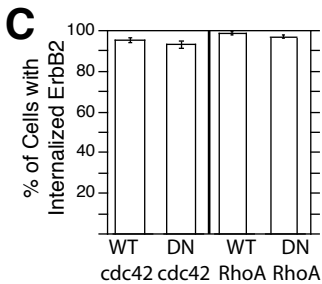

Supplement: jcs020404-sup-020404-figs3.pdf [file jcs020404-sup-020404-figs3.pdf]

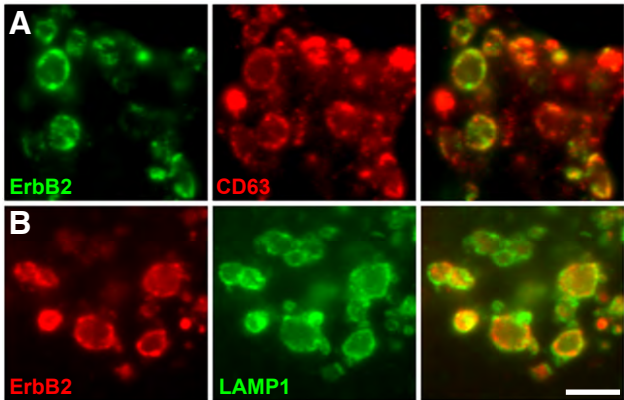

Supplement: jcs020404-sup-020404-figs4.pdf [file jcs020404-sup-020404-figs4.pdf]

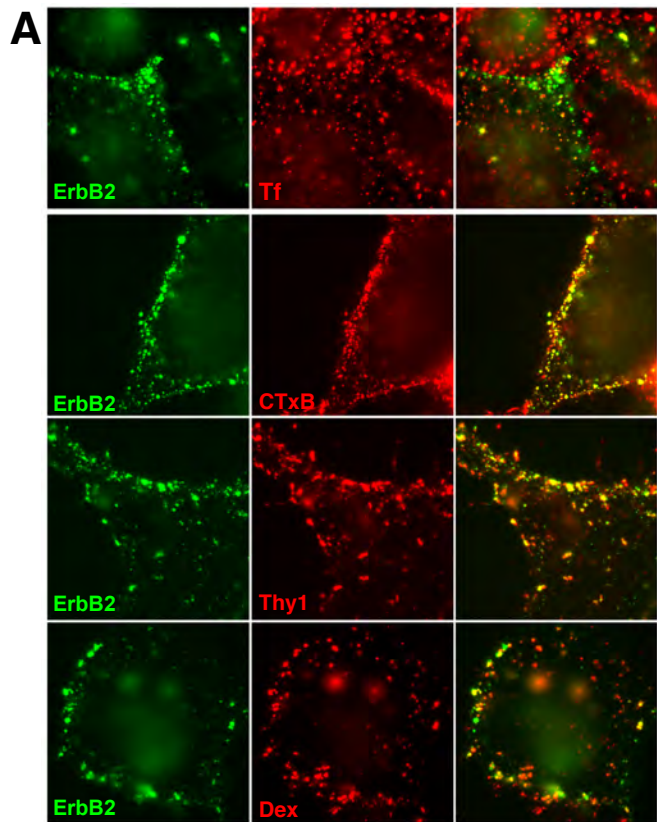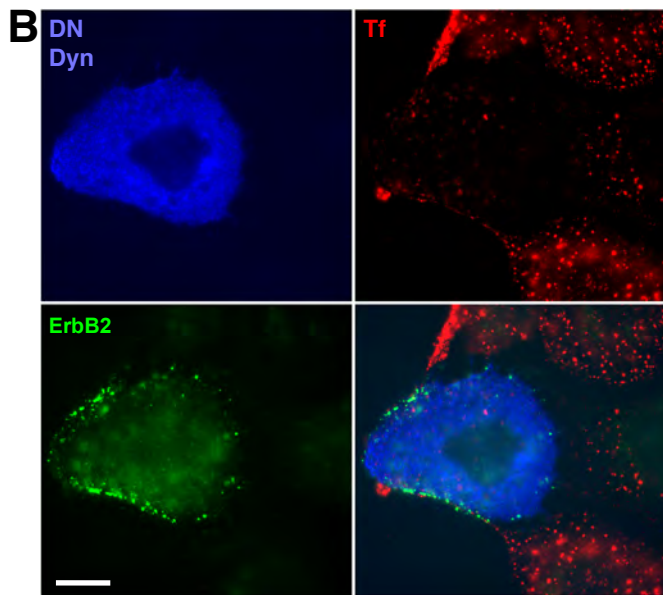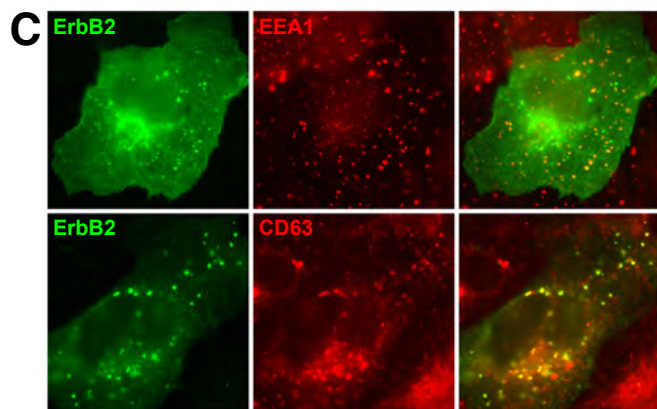

Supplement: jcs020404-sup-020404-figs5.pdf [file jcs020404-sup-020404-figs5.pdf]
